# Supplementary material for: Exploring the binding mode of HIV-1 Vif inhibitors by blind docking, molecular dynamics and MM/GBSA
Source: Royal Society of Chemistry journal article supplement (doi:10.1039/c3ra42291g), 2013-01-01
Supplement: c3ra42291g.pdf [file c3ra42291g.pdf]

## Supplementary Materials

# Exploring the binding mode of HIV-1 Vif inhibitors by blind docking, molecular dynamics and MM/GBSA

Meng Zhou, Hao Luo, Lufei Lu, Feng Wu, Wenjuan Zhang, Xueyan Hou, Guoyi Yan,  
Xuan Han, Mengqi Zhang, Rui Li, Zhengyu Ding

Binding free energies and individual energy terms of five compounds are listed in Table S1. The correlation between the experimental and the calculated  $pIC_{50}$  of eleven binding modes are shown in Figure S1.

**Table S1.** Binding free energies and individual energy terms of five compounds.

| Compound 1 |                         |                         |                        |                        |                                       |
|------------|-------------------------|-------------------------|------------------------|------------------------|---------------------------------------|
| Residue    | $\Delta G_{\text{vdw}}$ | $\Delta G_{\text{ele}}$ | $\Delta G_{\text{GB}}$ | $\Delta G_{\text{SA}}$ | $\Delta G_{\text{residue-inhibitor}}$ |
| GLN 136    | −1.10                   | −0.17                   | −0.20                  | −0.26                  | −1.72                                 |
| ALA 137    | −0.21                   | −0.12                   | 0.06                   | −0.05                  | −0.31                                 |
| GLY 138    | −0.39                   | −0.03                   | −0.02                  | −0.09                  | −0.52                                 |
| HIS 139    | −2.06                   | −0.01                   | −0.09                  | −0.33                  | −2.48                                 |
| SER 144    | −0.70                   | −0.35                   | 0.15                   | −0.19                  | −1.08                                 |
| TYR 147    | −1.08                   | 0.51                    | −0.37                  | −0.19                  | −1.13                                 |
| LEU 148    | −0.42                   | 0.01                    | −0.01                  | −0.11                  | −0.53                                 |
| LEU 150    | −0.98                   | −0.29                   | −0.09                  | −0.16                  | −1.51                                 |
| ALA 151    | −1.77                   | 0.38                    | −0.36                  | −0.23                  | −1.98                                 |
| ILE 154    | −0.76                   | −0.14                   | 0.05                   | −0.17                  | −1.02                                 |
| THR 155    | −1.55                   | −0.07                   | 0.01                   | −0.28                  | −1.89                                 |
| LYS 176    | −0.64                   | −1.86                   | 1.50                   | −0.14                  | −1.13                                 |
| PRO 177    | −1.11                   | 0.57                    | −0.50                  | −0.19                  | −1.22                                 |
| Compound 2 |                         |                         |                        |                        |                                       |
| Residue    | $\Delta G_{\text{vdw}}$ | $\Delta G_{\text{ele}}$ | $\Delta G_{\text{GB}}$ | $\Delta G_{\text{SA}}$ | $\Delta G_{\text{residue-inhibitor}}$ |
| GLN 136    | −0.70                   | −0.24                   | −0.48                  | −0.16                  | −1.57                                 |
| GLY 138    | −1.70                   | −0.66                   | −0.15                  | −0.26                  | −2.78                                 |
| HIS 139    | −1.55                   | −0.74                   | 0.53                   | −0.24                  | −2.00                                 |
| ASN 140    | −1.51                   | −0.02                   | −0.2                   | −0.28                  | −2.00                                 |
| TYR 147    | −2.63                   | 0.17                    | −0.18                  | −0.36                  | −3.00                                 |
| LEU 148    | −0.77                   | 0.11                    | −0.09                  | −0.24                  | −0.99                                 |
| LEU 150    | −0.81                   | 0.06                    | −0.18                  | −0.15                  | −1.08                                 |
| ALA 151    | −1.53                   | 0.35                    | −0.39                  | −0.24                  | −1.81                                 |
| ILE 154    | −0.50                   | −0.15                   | 0.08                   | −0.11                  | −0.67                                 |
| THR 155    | −1.22                   | −0.49                   | 0.35                   | −0.30                  | −1.65                                 |
| ILE 159    | −0.60                   | −0.20                   | 0.18                   | −0.14                  | −0.72                                 |
| ARG 173    | −0.45                   | −2.40                   | 2.21                   | −0.09                  | −0.74                                 |
| PRO 177    | −1.11                   | −3.24                   | 2.60                   | −0.20                  | −1.95                                 |
| Compound 3 |                         |                         |                        |                        |                                       |
| Residue    | $\Delta G_{\text{vdw}}$ | $\Delta G_{\text{ele}}$ | $\Delta G_{\text{GB}}$ | $\Delta G_{\text{SA}}$ | $\Delta G_{\text{residue-inhibitor}}$ |
| GLN 136    | −1.89                   | −1.80                   | 0.46                   | −0.43                  | −3.66                                 |
| ALA 137    | −1.49                   | −1.07                   | 0.42                   | −0.19                  | −2.33                                 |
| GLY 138    | −1.65                   | −1.15                   | 0.45                   | −0.20                  | −2.55                                 |
| HIS 139    | −2.53                   | −1.60                   | 0.06                   | −0.31                  | −4.37                                 |
| ASN 140    | −0.68                   | −0.89                   | 0.39                   | −0.70                  | −1.28                                 |
| LYS 141    | −1.08                   | −1.26                   | 0.47                   | −0.20                  | −2.07                                 |
| VAL 142    | −0.37                   | 0.24                    | −0.21                  | −0.07                  | −0.41                                 |
| TYR 147    | −1.90                   | −0.20                   | 0.04                   | −0.25                  | −2.31                                 |
| LEU 148    | −1.37                   | 0.31                    | −0.35                  | −0.32                  | −1.73                                 |
| LEU 150    | −1.25                   | 0.95                    | −0.82                  | −0.20                  | −1.31                                 |
| ALA 151    | −2.39                   | 0.59                    | −0.59                  | −0.25                  | −2.64                                 |

| ILE 154           | −0.78                   | −0.55                   | 0.24                   | −0.20                  | −1.29                                 |
|-------------------|-------------------------|-------------------------|------------------------|------------------------|---------------------------------------|
| <b>Compound 4</b> |                         |                         |                        |                        |                                       |
| Residue           | $\Delta G_{\text{vdw}}$ | $\Delta G_{\text{ele}}$ | $\Delta G_{\text{GB}}$ | $\Delta G_{\text{SA}}$ | $\Delta G_{\text{residue-inhibitor}}$ |
| GLN 136           | −0.53                   | −0.24                   | 0.16                   | −0.16                  | −0.77                                 |
| HIS 139           | −0.49                   | −0.25                   | 0.20                   | −0.07                  | −0.61                                 |
| ASN 140           | −1.97                   | −0.78                   | 0.04                   | −0.35                  | −3.06                                 |
| LYS 141           | −1.03                   | −1.94                   | 1.60                   | −0.16                  | −1.52                                 |
| VAL 142           | −0.57                   | 0.19                    | −0.20                  | −0.19                  | −0.77                                 |
| TYR 147           | −1.50                   | −0.06                   | −0.17                  | −0.24                  | −1.97                                 |
| LEU 148           | −1.68                   | 0.13                    | −0.13                  | −0.33                  | −2.01                                 |
| LEU 150           | −1.09                   | −0.52                   | 0.12                   | −0.20                  | −1.66                                 |
| ALA 151           | −2.29                   | −0.15                   | 0.05                   | −0.28                  | −2.67                                 |
| ALA 152           | −0.57                   | −0.02                   | 0.11                   | −0.13                  | −0.62                                 |
| ILE 154           | −0.48                   | −0.19                   | 0.10                   | −0.13                  | −0.70                                 |
| THR 155           | −0.41                   | 0.07                    | −0.08                  | −0.13                  | −0.55                                 |
| LYS 176           | −0.27                   | −2.01                   | 1.81                   | −0.09                  | −0.57                                 |
| <b>Compound 5</b> |                         |                         |                        |                        |                                       |
| Residue           | $\Delta G_{\text{vdw}}$ | $\Delta G_{\text{ele}}$ | $\Delta G_{\text{GB}}$ | $\Delta G_{\text{SA}}$ | $\Delta G_{\text{residue-inhibitor}}$ |
| GLU 134           | −0.42                   | −1.26                   | 1.12                   | −0.17                  | −0.74                                 |
| GLN 136           | −2.42                   | −1.00                   | 0.58                   | −0.35                  | −3.19                                 |
| ALA 137           | −1.11                   | 0.01                    | −0.02                  | −0.19                  | −1.30                                 |
| GLY 138           | −1.12                   | 0.26                    | −0.05                  | −0.16                  | −1.07                                 |
| HIS 139           | −0.39                   | −0.01                   | 0.02                   | −0.06                  | −0.44                                 |
| LYS 141           | −0.35                   | 0.15                    | −0.17                  | −0.10                  | −0.48                                 |
| GLY 143           | −0.44                   | 0.13                    | −0.04                  | −0.16                  | −0.52                                 |
| SER 144           | −0.32                   | −0.80                   | 0.59                   | −0.06                  | −0.60                                 |
| TYR 147           | −3.07                   | −0.83                   | 0.65                   | −0.45                  | −3.71                                 |
| LEU 148           | −1.32                   | 0.33                    | −0.35                  | −0.32                  | −1.66                                 |
| LEU 150           | −0.97                   | 0.34                    | −0.42                  | −0.20                  | −1.23                                 |
| ALA 151           | −2.29                   | 0.07                    | −0.22                  | −0.25                  | −2.70                                 |
| ILE 154           | −1.14                   | −0.13                   | 0.15                   | −0.23                  | −1.35                                 |
| THR 155           | −0.84                   | −0.27                   | 0.28                   | −0.23                  | −1.07                                 |
| LYS 176           | −0.97                   | −0.24                   | 0.15                   | −0.17                  | −1.23                                 |
| PRO 177           | −1.69                   | −1.78                   | 1.10                   | −0.22                  | −2.58                                 |

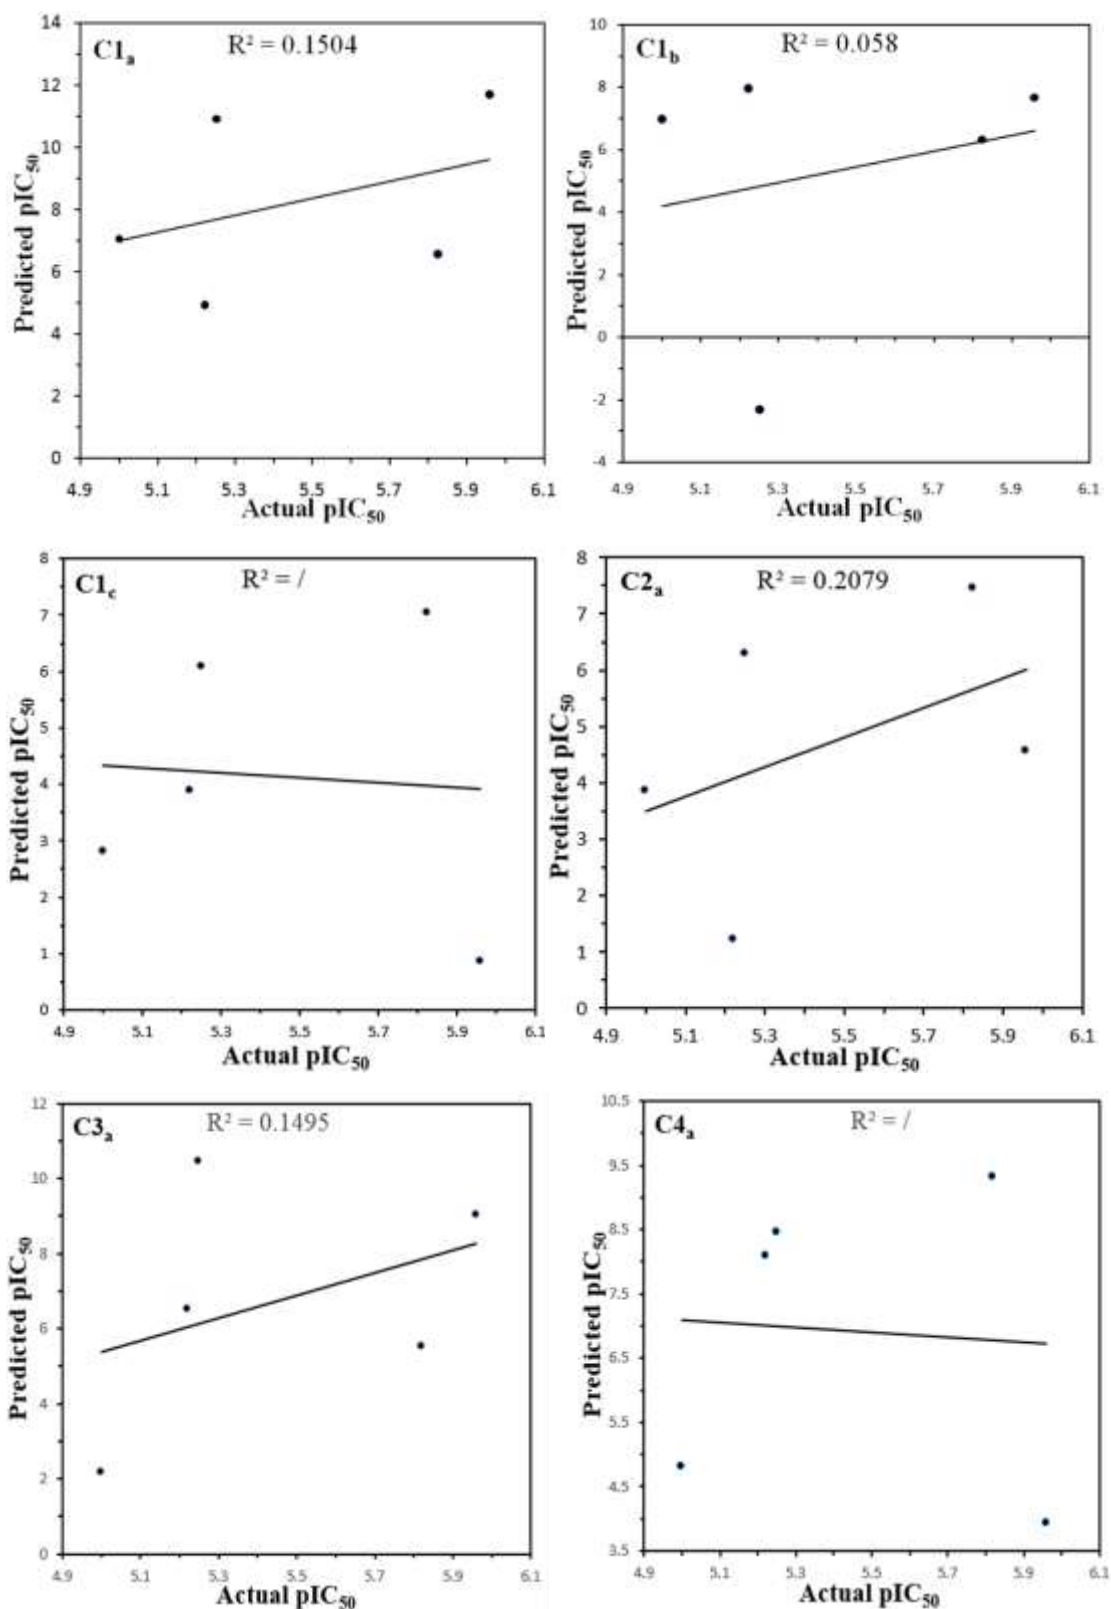

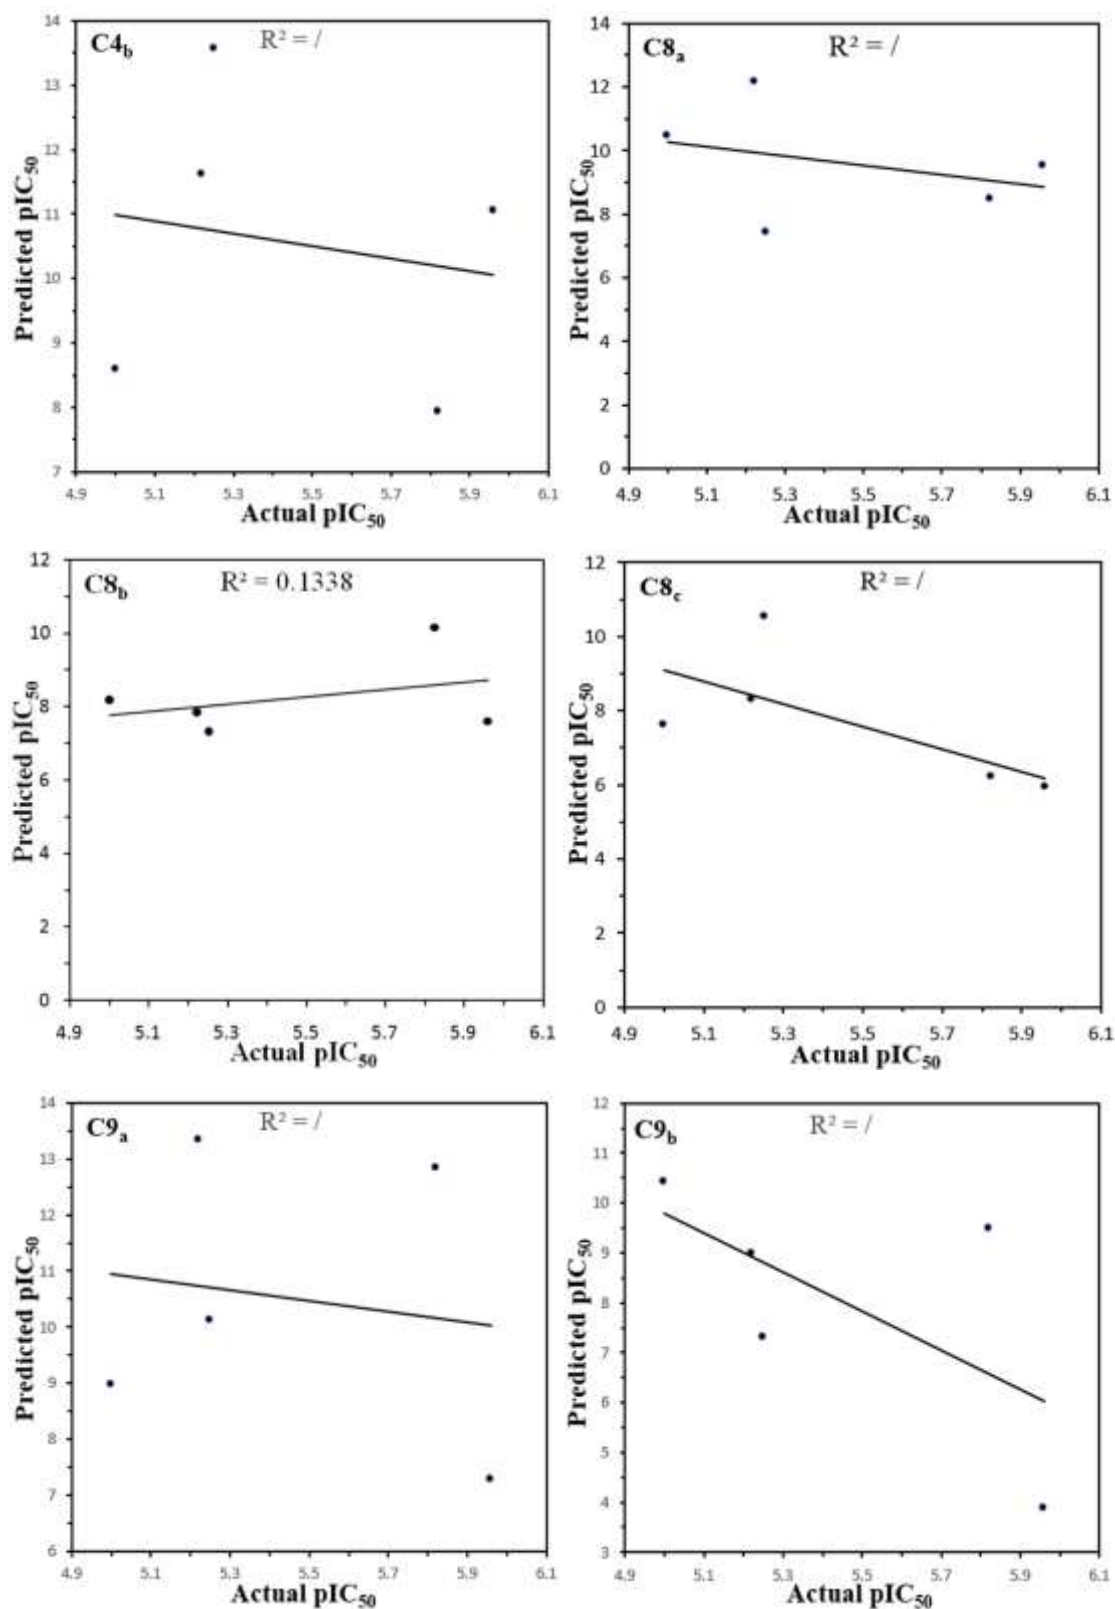

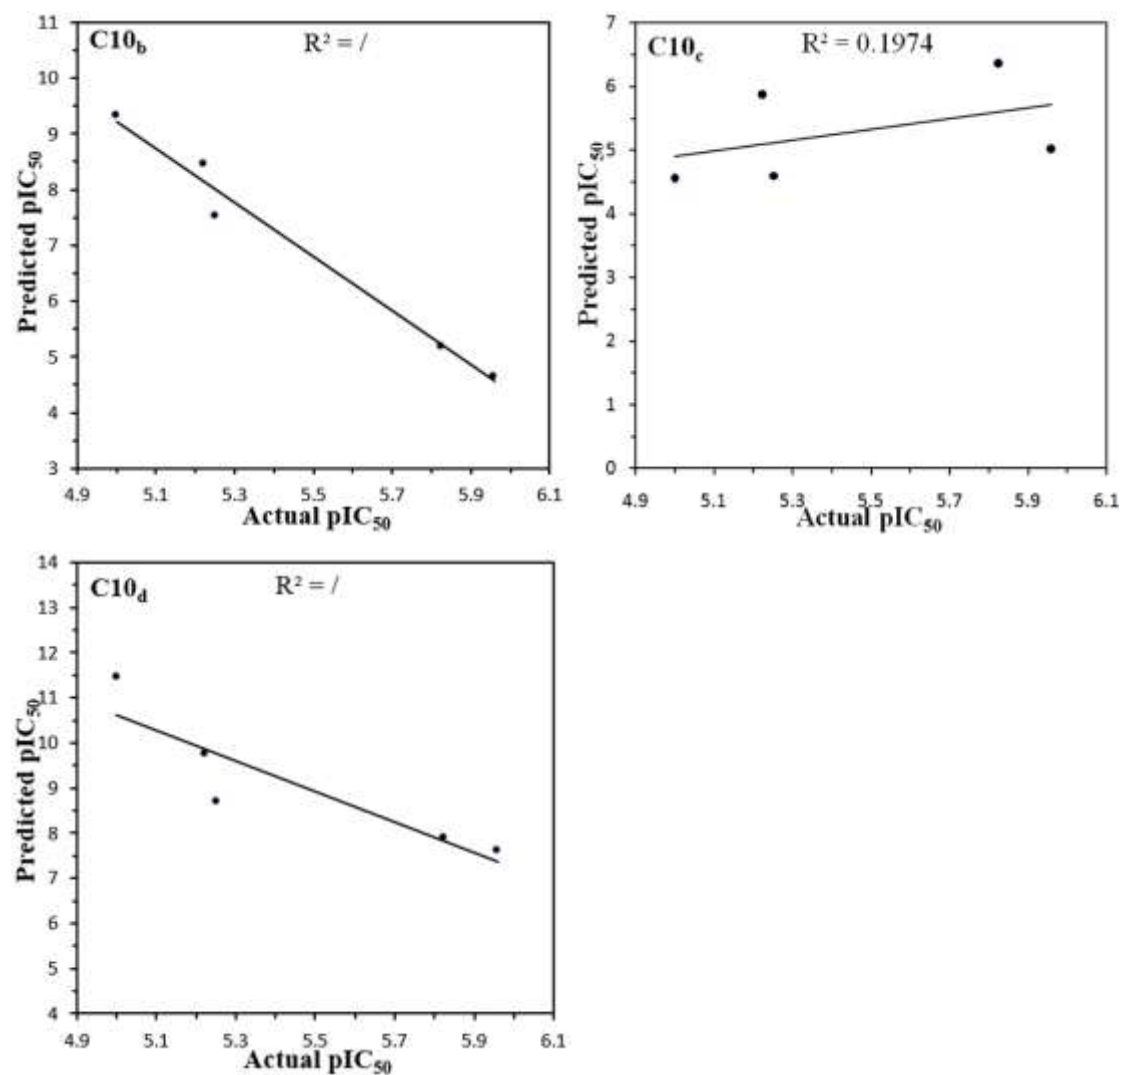

**Figure S1.** The correlation between the experimental and the calculated  $pIC_{50}$  of fifteen binding modes.
